# Supplementary material for: Reactive polymeric micelles with disulfide groups in the coronae
Source: Royal Society of Chemistry journal article supplement (doi:10.1039/c4py00938j), 2014-07-29
Supplement: c4py00938j1.pdf [file c4py00938j1.pdf]

## Supporting Information Part

### Reactive Polymeric Micelles with Disulfide Groups in the Coronae

Lichao Sun, Jinchuan Liu, Hanying Zhao

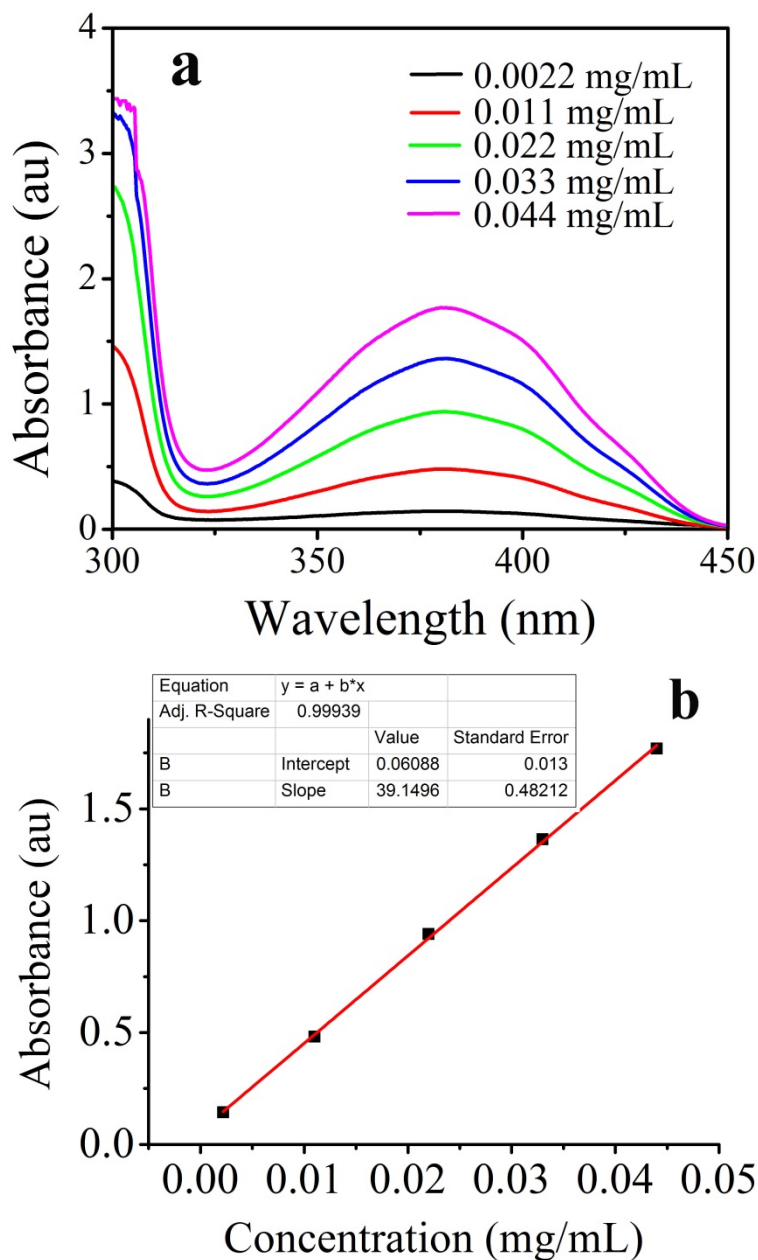

**Figure S1.** (a) Absorptions of pyridine-2-thione in THF at different concentrations, (b) a standard curve of absorbance of pyridine-2-thione vs. concentration in THF.

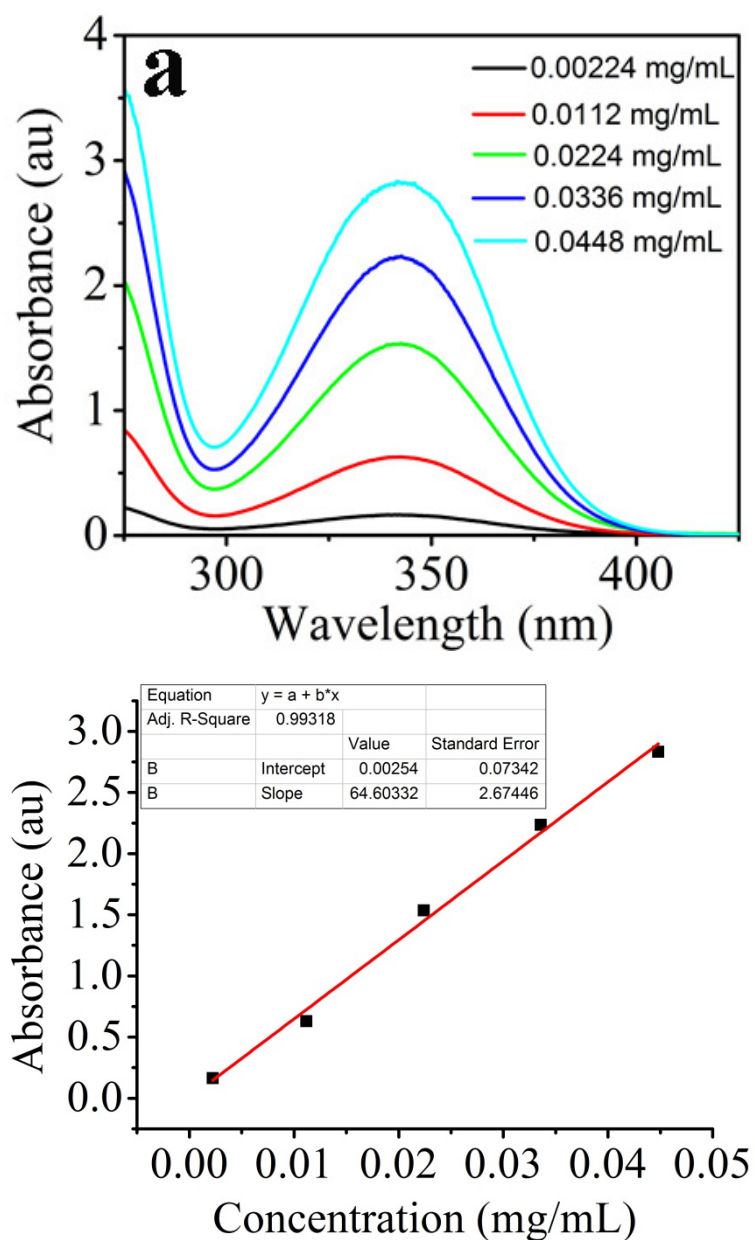

**Figure S2.** (a) Absorptions of pyridine-2-thione in PBS buffer solution at different concentrations, (b) a standard curve of absorbance of pyridine-2-thione vs. concentration.

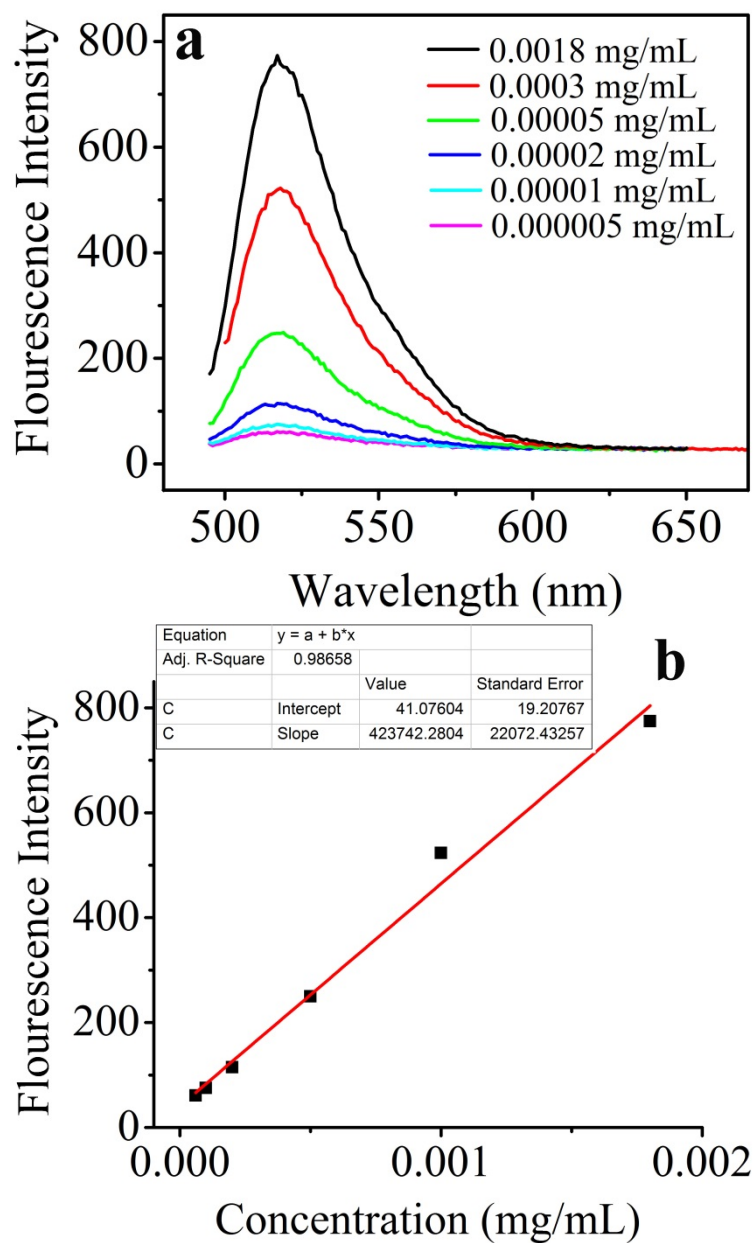

**Figure S3.** (a) Emission spectra of FITC recorded at different concentrations in buffer solution, (b) a plot of intensity of fluorescence emission of FITC vs. concentration.
